# Supplementary material for: A single-atom Fe–N4 catalytic site mimicking bifunctional antioxidative enzymes for oxidative stress cytoprotection
Source: Royal Society of Chemistry journal article supplement (doi:10.1039/c8cc08116f), 2018-11-19
Supplement: c8cc08116f1.pdf [file c8cc08116f1.pdf]

Electronic Supplementary Information

# An Single-Atom Fe-N<sub>4</sub> Catalytic Site Mimicking Bifunctional Antioxidative Enzymes for Oxidative Stress Cytoprotection

Wenjie Ma,<sup>‡,a,e</sup> Junjie Mao, <sup>‡,b</sup> Xiaoti Yang,<sup>a,e</sup> Cong Pan,<sup>a,e</sup> Wenxing Chen,<sup>d</sup> Ming Wang,<sup>a,e</sup> Ping Yu,<sup>a,e</sup> Lanqun Mao<sup>\*,a,e</sup> and Yadong Li<sup>c</sup>

<sup>a</sup> *Beijing National Laboratory for Molecular Sciences, Key Laboratory of Analytical Chemistry for Living Biosystems, Institute of Chemistry, The Chinese Academy of Sciences (CAS), CAS Research/Education Center for Excellence in Molecule Science, Beijing 100190, China.*

<sup>b</sup> *College of Chemistry and Materials Science, Anhui Normal University, Wuhu 241002, China.*

<sup>c</sup> *Department of Chemistry, Tsinghua University, Beijing 100084, China.*

<sup>d</sup> *Beijing Key Laboratory of Construction Tailorable Advanced Functional Materials and Green Applications, School of Materials Science and Engineering, Beijing Institute of Technology, Beijing 100081, China.*

<sup>e</sup> *University of Chinese Academy of Sciences, Beijing 100049, China.*

## Table of Contents

|                                                                                                  |    |
|--------------------------------------------------------------------------------------------------|----|
| Experimental Section.....                                                                        | S1 |
| Characterization of Fe-SAs/NC.....                                                               | S2 |
| EXAFS analysis.....                                                                              | S3 |
| Cyclic voltammetry measurements of Fe-SAs/NC.....                                                | S4 |
| CAT-like activity of Fe-SAs/NC-based SAzyme.....                                                 | S5 |
| Comparison of CAT-like activity between Fe-SAs/NC-based SAzyme and other reported nanozymes..... | S6 |

<sup>‡</sup> These authors contributed equally to this work.

\* Corresponding Author. E-mail: lqmao@iccas.ac.cn, Fax: +86-10-62559373.

## S1- Experimental Section

### 1 Chemical Reagent

Iron phthalocyanine (FePc, Alfa Aesar), zinc nitrate hexahydrate (Alfa Aesar), 2-methylimidazole (Acros), methanol (Sinopharm Chemical), N, N-dimethylformamide (Sinopharm Chemical), 30% H<sub>2</sub>O<sub>2</sub> (Beijing Chemical Reagents), 5-tert-butoxycarbonyl-5-methyl-1-pyrroline N-oxide (BMPO, Dojindo), ethylenediaminetetraacetic acid disodium salt (EDTA, Sinopharm Chemical), SOD assay kits (Sigma-Aldrich), hypoxanthine (Sigma-Aldrich), xanthine oxidase (Sigma-Aldrich), DCFDA (Sigma-Aldrich),  $\beta$ -lapachone ( $\beta$ -Lap, Abcam) were used without any further purification. Britton–Robinson buffer (BR buffer) was prepared by mixing 0.04 M H<sub>3</sub>PO<sub>4</sub>, HNO<sub>3</sub>, H<sub>3</sub>BO<sub>3</sub>, and the pH values of the solutions were adjusted by 0.2 M NaOH. Aqueous solutions were all prepared with pure water obtained from a Milli-Q water system (Millipore, 18.2 M $\Omega$  cm). Unless stated otherwise, all experiments were carried out at room temperature.

### 2 Experimental Details

**2.1 Materials Synthesis.** ZIF-8 and FePc-encapsulated ZIF-8 were prepared at room temperature. In a typical synthesis of FePc encapsulated ZIF-8, Zn(NO<sub>3</sub>)<sub>2</sub>·6H<sub>2</sub>O (734.5 mg) and FePc (25 mg) were dissolved in 50 mL methanol in flask A to form a homogeneous solution. 2-Methylimidazole (810.6 mg) was dissolved in 50 mL methanol in flask B. Then, flask A was rapidly poured into flask B and stirred for 24 h at room temperature. The obtained products were washed with methanol for several times and finally dried in vacuum at 70 °C overnight. ZIF-8 without FePc encapsulation was prepared following the same procedure as that employed for the synthesis of FePc-encapsulated ZIF-8.

FeSAs/NC and NC catalysts were obtained via a high-temperature pyrolysis approach. The as-prepared FePc-encapsulated ZIF-8 or pure ZIF-8 precursors were pyrolyzed on a quartz tube in an electric furnace under nitrogen atmosphere at 900 °C for 3 h and cooled down naturally to room temperature. The obtained Fe-SAs/NC was treated with 0.5 M H<sub>2</sub>SO<sub>4</sub> for 24 h and washed several times with distilled water, and finally dried in vacuum at 70 °C overnight.

**2.2 Instrument and Characterization.** X-ray powder diffraction (XRD) patterns were performed on a Rigaku RU-200b X-ray powder diffractometer with Cu K $\alpha$  radiation ( $\lambda$  = 1.5406 Å). TEM images were conducted on a Hitachi H-800 transmission electron microscope. High-resolution TEM images were obtained by using a FEI Tecnai G2 F20 S-Twin high-resolution transmission electron microscope operated at 200kV. The high-angle annular dark-field scanning transmission electron microscopy (HAADF-STEM) images were carried out by a Titan 80-300 scanning/transmission electron microscope operated at 300 kV, equipped with a probe spherical aberration corrector.

**2.3 XAFS measurements.** The X-ray absorption fine structure spectra (Fe K-edge) were collected at 1W1B station in Beijing Synchrotron Radiation Facility (BSRF). The storage rings of BSRF were

operated at 2.5 GeV with a maximum current of 250 mA. Using Si(111) double-crystal monochromator, the data was collected in transmission mode using ionization chamber for Fe foil, FeO, Fe<sub>2</sub>O<sub>3</sub>, and in fluorescence excitation mode using a Lytle detector for Fe-SAs/NC. All spectra were collected under ambient conditions.

**2.4 XAFS Analysis.** The obtained EXAFS data were processed according to the standard procedures using the ATHENA module implemented in the IFEFFIT software packages. The k<sup>3</sup>-weighted EXAFS spectra were acquired by subtracting the post-edge background from the overall absorption and then normalizing with respect to the edge-jump step. Subsequently, k<sup>3</sup>-weighted  $\chi(k)$  data of Fe K-edge were Fourier transformed to real (R) space using a hanning windows ( $dk=1.0 \text{ \AA}^{-1}$ ) to separate the EXAFS contributions from different coordination shells. To obtain the quantitative structural parameters around central atoms, least-squares curve parameter fitting was conducted using the ARTEMIS module of IFEFFIT software packages. The following EXAFS equation was used:

$$\chi(k) = \sum_j \frac{N_j S_0^2 F_j(k)}{k R_j^2} \exp[-2k^2 \sigma_j^2] \exp\left[\frac{-2R_j}{\lambda(k)}\right] \sin[2kR_j + \phi_j(k)]$$

$S_0^2$  is the amplitude reduction factor,  $F_j(k)$  is the effective curved-wave backscattering amplitude,  $N_j$  is the number of neighbors in the  $j^{\text{th}}$  atomic shell,  $R_j$  is the distance between the X-ray absorbing central atom and the atoms in the  $j^{\text{th}}$  atomic shell (backscatterer),  $\lambda$  is the mean free path in  $\text{\AA}$ ,  $\phi_j(k)$  is the phase shift (including the phase shift for each shell and the total central atom phase shift),  $\sigma_j$  is the Debye-Waller parameter of the  $j^{\text{th}}$  atomic shell (variation of distances around the average  $R_j$ ). The functions  $F_j(k)$ ,  $\lambda$  and  $\phi_j(k)$  were calculated with the ab initio code FEFF8.2.

**2.5 Cyclic voltammetry.** Cyclic voltammetry measurements were performed on a computer-controlled electrochemical analyzer (CHI 730D, Shanghai, China), with an Ag/AgCl (KCl, 3 M) electrode as reference electrode and a Pt wire as counter electrode. For the preparation of working electrodes, 1 mg of Fe-SAs/NC or NC catalyst was dispersed into 1 mL of pure water under sonication for 1 h. Then, 10  $\mu\text{L}$  of the suspension was drop-coated onto glassy carbon (GC) electrode (3 mm in diameter). The electrode was dried under ambient conditions, followed by dropwise coating of 0.5% Nafion (2  $\mu\text{L}$ ). The prepared working electrodes were used for cyclic voltammetric measurements.

**2.6 Catalase-like activity of Fe-SAs/NC.** The CAT-like activity was verified by determining the O<sub>2</sub> generation during H<sub>2</sub>O<sub>2</sub> decomposition using a portable dissolved oxygen meter (Seven2Go™ DO, Mettler Toledo). In a typical test, 5  $\mu\text{g/mL}$  Fe-SAs/NC was added to a solution of 5 mM H<sub>2</sub>O<sub>2</sub> in BR buffer solution (pH 7.0), and the generated O<sub>2</sub> solubility (unit: mg/L) was recorded at different reaction times. The kinetic analysis of the Fe-SAs/NC with H<sub>2</sub>O<sub>2</sub> as the substrate was performed by varying the concentration of H<sub>2</sub>O<sub>2</sub> (0.5-4.0 mM) in the presence of Fe-SAs/NC at fixed concentration of 5  $\mu\text{g/mL}$ . The corresponding Lineweaver-Burk plots were obtained from Michaelis-Menten curves. For comparison, the CAT-like activity of NC was also conducted under

identical conditions. In order to compare the efficiency of Fe-SAs/NC with other reported nanozymes, we calculated the TOF (turnover frequency) values per active site of Fe-SAs/NC-based enzyme and nanozymes reported in literature, according to the following equation and the results were summarized in Table S2:

$$\text{TOF} = V_{\text{max}}/C_{\text{active sites}}$$

where,  $V_{\text{max}}$  represents the maximum rate achieved by the system, at saturating substrate concentration.  $C_{\text{active sites}}$  stands for the concentration of active sites in the system.

**2.7 SOD-like activity of Fe-SAs/NC.** The ability of Fe-SAs/NC to scavenge superoxide and its comparison with NC was determined using SOD assay kits following the manufacturer's instructions.

**2.8 Electron paramagnetic resonance (EPR) spectroscopy.** EPR measurement were conducted using a Bruker model EPR 300E spectrometer, which was equipped with a Quanta-Ray Nd:YAG laser (532 nm). For all EPR measurements, the same quartz capillary tube was used to minimize experimental errors. In a typical measurement, 50 µg/mL Fe-SAs/NC or NC was added to a mixture of 25 mM BMPO, 0.2 mM EDTA, 0.5 mM hypoxanthine and 0.05 U/mL XO in BR buffer solution (pH 7.0). EPR spectrum was recorded after 1.5 min of mixing.

**2.9 Cell culture.** HeLa cells were purchased from (National Infrastructure of Cell Line Resource, China) and maintained in high-glucose dulbecco's modified eagle medium (DMEM) supplemented with 10% fetal bovine serum (FBS) and 1% penicillin/streptomycin at 37 °C in the presence of 5 % CO<sub>2</sub>. For the intracellular delivery, cells were sub-cultured and seeded in 48-well plates 24 h prior to experiment. DMEM, FBS and penicillin/streptomycin were purchased from Gibco (NY, USA).

**2.10 Cell uptake study of Fe-SAs/NC-based SAzyme.** To study the cellular uptake of Fe-SAs/NC-based SAzyme, HeLa cells were seeded at a density of  $1.5 \times 10^5$  cells in glass bottom cell culture dish (NEST Biotechnology, Wuxi, China) for 24 h prior to experiment, and then treated with Fe-SAs/NC-based SAzyme (at a concentration of 30 µg/mL) for 12 h at 37 °C. At the end of incubation, the cells were washed thoroughly with Dulbecco's phosphate-buffered saline (DPBS) twice, followed by confocal laser scanning microscopy (CLSM) imaging on OLYMPUS FV1000-IX81.

**2.11 Intracellular ROS detection of cells.** The intracellular ROS levels of HeLa cells with and without Fe-SAs/NC-based SAzyme treatment were measured using 2',7'-dichlorodihydrofluorescein diacetate (DCFDA-H<sub>2</sub>) staining and flow cytometry analysis. HeLa cells were seeded in a 24-well plate at a density of  $5 \times 10^4$  per well, with 12 h of Fe-SAs/NC-based SAzyme treatment, the cell culture medium was replaced and then treated with β-Lap for 6 h. At the end of incubation, the cells were harvested and washed with DPBS, followed by DCFDA (1 µM) staining, and immediately subjected to flow cytometry analysis on a Beckman Coulter CytoFLEX (Beckman Coulter, USA). Control experiments using NC nanoparticles were carried out in the same procedure to that of using Fe-SAs/NC-based SAzyme.

**2.12 Cell viability of HeLa cells with Fe-SAs/NC and β-Lap co-treatment.** To verify Fe-

SAs/NC-based SAzyme can protect cells against oxidative stress, HeLa cells were seeded in 48-well plates at a density of  $2.5 \times 10^4$  cells per well for 24 h prior to experiment. At the day of experiment, Fe-SAs/NC-based SAzyme were added to cells at the final concentration ranging from 30 to 50  $\mu\text{g/mL}$ . After 12 h of incubation, the mixtures were replaced with fresh cell culture medium, followed by 12 h of 10  $\mu\text{M}$   $\beta$ -Lap treatment, and then cell viability was assayed by using Alamar-Blue assay. Control experiments using NC nanoparticles were studied under the same condition to that of Fe-SAs/NC nanocomposites.

## S2-Characterization of Fe-SAs/NC

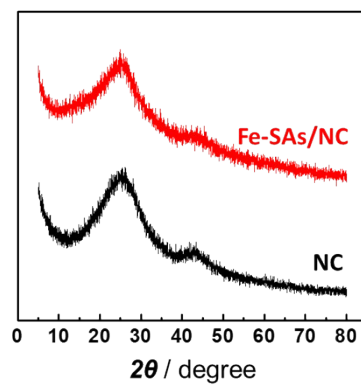

**Fig. S1** PXRD patterns of the NC (black line) and Fe-SAs/NC (red line).

### S3- EXAFS analysis

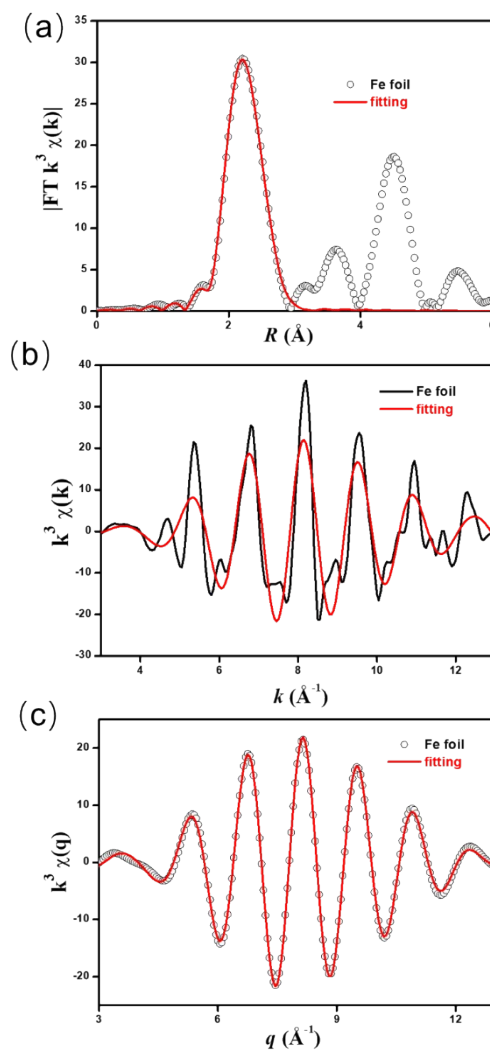

**Fig. S2** The corresponding EXAFS fitting curves of Fe foil at (a) R space, (b) k space and (c) q space.

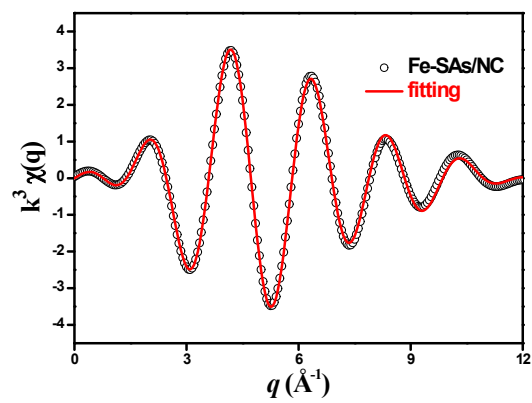

**Fig. S3** The corresponding EXAFS fitting curves of Fe-SAs/NC at q space.

**Table S1.** Structural parameters extracted from the Fe K-edge EXAFS fitting. ( $S_0^2=0.74$ )

| sample    | Scattering pair | CN  | R(Å) | $\sigma^2(10^{-3}\text{Å}^2)$ | $\Delta E_0(\text{eV})$ | R factor |
|-----------|-----------------|-----|------|-------------------------------|-------------------------|----------|
| Fe-SAs/NC | Fe-N            | 4.2 | 2.01 | 7.3                           | -2.2                    | 0.002    |
| Fe foil   | Fe-Fe1          | 8*  | 2.46 | 4.9                           | 4.5                     | 0.005    |
|           | Fe-Fe2          | 6*  | 2.84 | 5.4                           |                         |          |

$S_0^2$  is the amplitude reduction factor; CN is the coordination number; R is interatomic distance (the bond length between central atoms and surrounding coordination atoms);  $\sigma^2$  is Debye-Waller factor (a measure of thermal and static disorder in absorber-scatterer distances);  $\Delta E_0$  is edge-energy shift (the difference between the zero kinetic energy value of the sample and that of the theoretical model). R factor is used to value the goodness of the fitting.

\* This value was fixed during EXAFS fitting, based on the known structure.

Error bounds that characterize the structural parameters obtained by EXAFS spectroscopy were estimated as  $N \pm 20\%$ ;  $R \pm 1\%$ ;  $\sigma^2 \pm 20\%$ ;  $\Delta E_0 \pm 20\%$ .

Fe-SAs/NC (FT range: 2.0-11.0  $\text{\AA}^{-1}$ ; fitting range: 0.7-2.0  $\text{\AA}$ )

Fe foil (FT range: 2.0-12.5  $\text{\AA}^{-1}$ ; fitting range: 1.3-3.0  $\text{\AA}$ )

#### S4- Cyclic voltammetry of Fe-SAs/NC

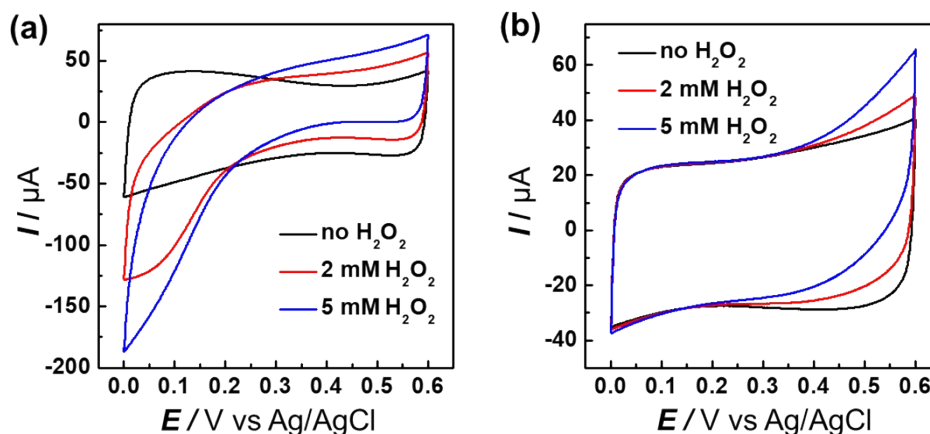

**Fig. S4** Typical cyclic voltammograms obtained at Fe-SAs/NC- (a) and NC-modified (b) glassy carbon (GC) electrodes in the absence (black line) and presence of  $\text{H}_2\text{O}_2$  (red line for 2 mM, blue line for 5 mM) in B-R buffer (pH 7.0) saturated with  $\text{N}_2$ .

The capability of Fe-SAs/NC to mimic CAT was studied by using cyclic voltammetry with Fe-SAs/NC-modified glassy carbon (GC) electrode as a working electrode in Britton-Robinson (B-R) buffer (pH 7.0) (Figure S4a). For comparison, cyclic voltammetry with the NC-modified GC electrode was also recorded under the same condition (Figure S4b). No redox peaks were recorded at the Fe-SAs/NC-modified GC electrode in BR buffer solution in the absence of  $\text{H}_2\text{O}_2$ , possibly because of the large background current resulted from the porous and conducting NC. The addition of  $\text{H}_2\text{O}_2$  into the solution produces anodic current commencing at ca. +0.23 V and cathodic current starting at ca. +0.21 V, which were ascribed to oxidation and reduction of  $\text{H}_2\text{O}_2$ , respectively. However, at the NC-modified electrode, the addition of  $\text{H}_2\text{O}_2$  did not produce current response at the potentials close to those at the Fe-SAs/NC-modified GC electrode. These results indicate that the Fe-SAs/NC can catalyze both the oxidation and reduction of  $\text{H}_2\text{O}_2$ , i.e., disproportionation of  $\text{H}_2\text{O}_2$ , and thus mimic CAT.

### S5- CAT-like activity of Fe-SAs/NC-based SAzyme

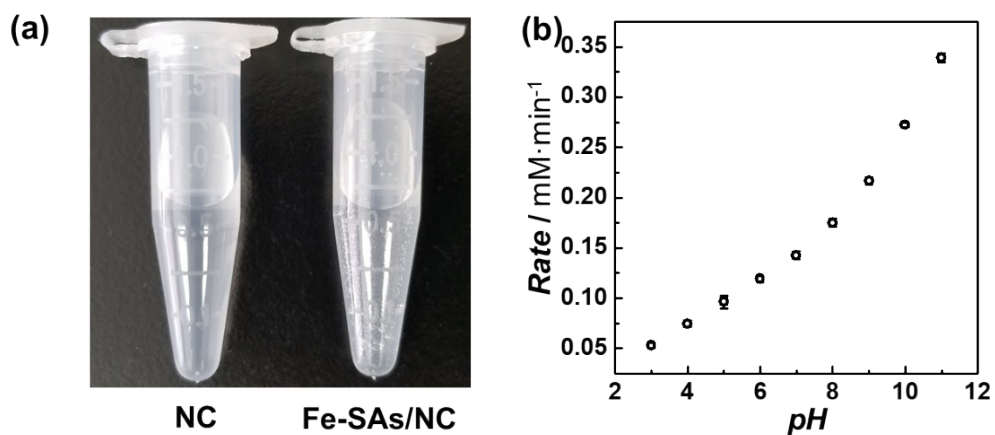

**Fig. S5** (a) Images of systems in BR buffer solution (pH 7.0) containing 5 mM H<sub>2</sub>O<sub>2</sub> catalyzed by NC (left) and Fe-SAs/NC (right) catalysts for 5 min. (b) Effect of pH on the catalytic activity of Fe-SAs/NC catalysts.

**S6- Comparison of CAT-like activity between Fe-SAs/NC-based SAzyme and other reported nanozymes.**

**Table S2.** TOF values per active site of Fe-SAs/NC-based enzyme with other reported nanozymes.

| Catalysts                           | $V_{max}/\text{mM}\cdot\text{min}^{-1}$ | Metal content/wt% | $C_{Catalysts}/\mu\text{g}\cdot\text{mL}^{-1}$ | TOF/ $\text{min}^{-1}$ | Reference                                      |
|-------------------------------------|-----------------------------------------|-------------------|------------------------------------------------|------------------------|------------------------------------------------|
| Fe-SAs/NC                           | 0.405                                   | 0.25%*            | 5                                              | 1809.34                | This work                                      |
| $\text{Co}_3\text{O}_4$ nanoplates  | 0.143                                   | 73.4%             | 20                                             | 0.57                   | ACS Appl. Mater. Interfaces 2014, 6, 7090-7098 |
| $\text{Co}_3\text{O}_4$ nanorods    | 0.113                                   | 73.4%             | 20                                             | 0.45                   |                                                |
| $\text{Co}_3\text{O}_4$ nanocubes   | 0.074                                   | 73.4%             | 20                                             | 0.30                   |                                                |
| Pd octahedrons                      | 0.354                                   | 100%              | 25                                             | 1.51                   | ACS Nano 2016, 10, 10436-10445                 |
| $\text{Mn}_3\text{O}_4$ nanoflowers | 7.33                                    | 72%               | 5                                              | 111.86                 | Angew. Chem. Int. Ed. 2017, 56, 14267-14271    |

\* The Fe content is about 0.25 wt%, measured by inductively coupled plasma optical emission spectrometry (ICP-OES) analysis.
